# Supplementary material
Source: PubMed Central journal article supplement (PMC4048580)
Supplement: Supp_Fig1.pdf [file Supp_Fig1.pdf]

## Supplementary Data

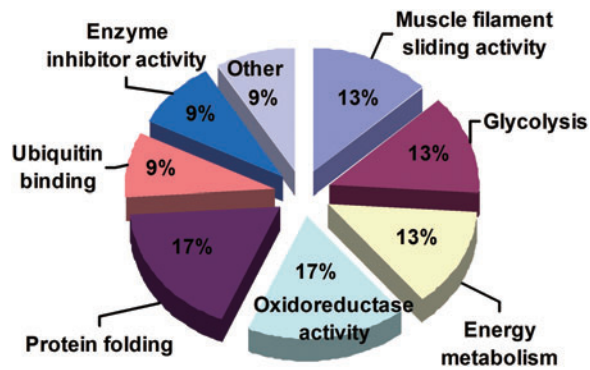

**SUPPLEMENTARY FIG. S1. Schematic diagram of proteomics analysis results based on molecular function.** The pie chart showing ontological classification of the 22 differentially expressed proteins in terms of molecular function, according to the gene ontology ([www.geneontology.org](http://www.geneontology.org)) and UniProt ([www.expasy.uniprot.org](http://www.expasy.uniprot.org)) database.
