# Supplementary material
Source: PubMed Central journal article supplement (PMC4048580)
Supplement: Supp_Fig2.pdf [file Supp_Fig2.pdf]

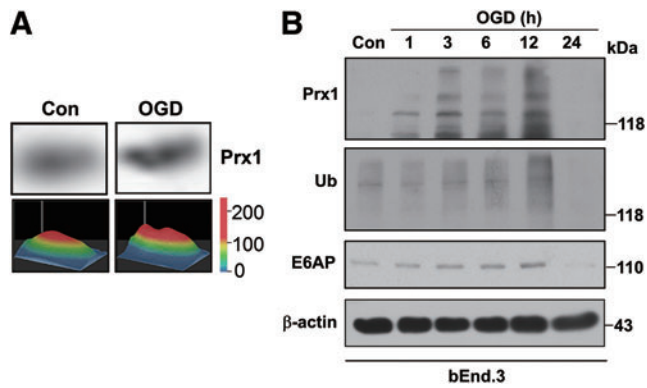

**SUPPLEMENTARY FIG. S2. Expression profile of Prx1 in endothelial cells after OGD.** (A) The expression profiles of Prx1 from endothelial cells EA.hy926 with or without 6 h OGD treatment were analyzed by two-dimensional gel electrophoresis (*upper panel*). Digital representation of band intensities from control and OGD-treated endothelial cells EA.hy926 (*lower panel*). (B) The temporal change of OGD-induced protein expression in mouse cerebral microvascular endothelial cells bEnd.3 was detected by western blot. OGD, oxygen-glucose deprivation; Prx1, peroxiredoxin 1.
