# Supplementary material
Source: PubMed Central journal article supplement (PMC4048580)
Supplement: Supp_Fig3.pdf [file Supp_Fig3.pdf]

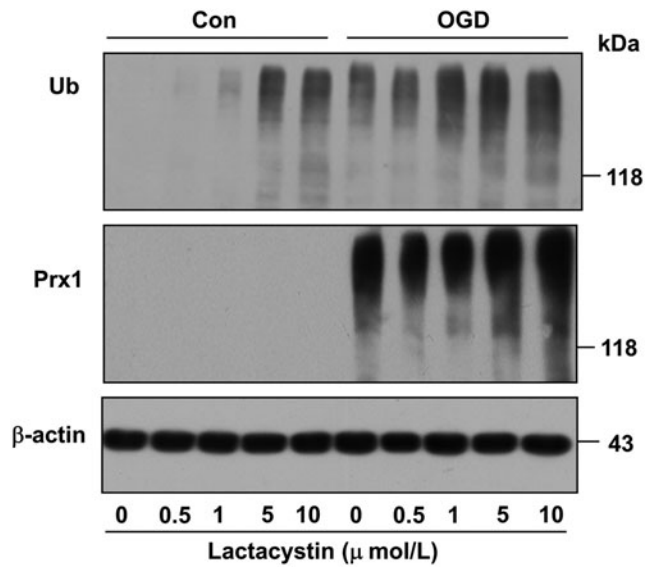

**SUPPLEMENTARY FIG. S3. The effect of lactacystin on OGD-induced Prx1 polyubiquitination in endothelial cells.** The EA.hy926 endothelial cells were treated for 30 min with or without lactacystin (0, 0.5, 1, 5, or 10  $\mu M$ ) before expose to OGD. The anti-ubiquitin and anti-Prx1 antibodies were used to detect the changes of Prx1 ubiquitination.
