# Supplementary material
Source: PubMed Central journal article supplement (PMC4048580)
Supplement: Supp_Fig4.pdf [file Supp_Fig4.pdf]

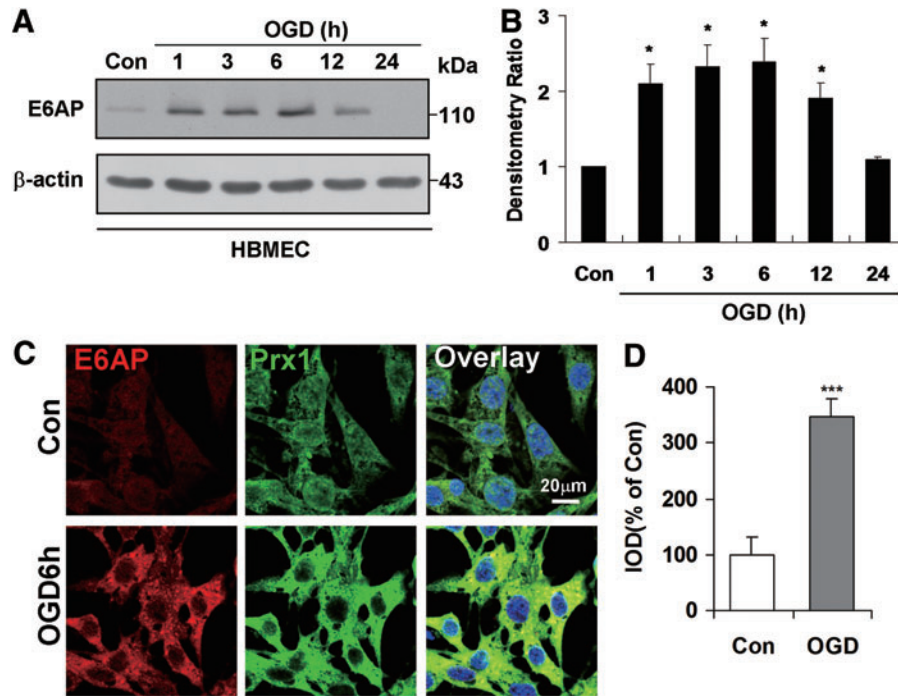

**SUPPLEMENTARY FIG. S4. Expression profile of E6AP in HBMEC endothelial cells after OGD.** (A) The time-dependent change of OGD-induced E6AP expression in HBMECs was detected by western blot. (B) Densitometry of the western blots for (A) was normalized by the level of  $\beta$ -actin as an internal control.  $*p < 0.05$  versus control. (C) Immunocytochemical analysis of E6AP expression in HBMEC after OGD treatment. DAPI counterstaining indicates nuclear localization (blue). Scale bar = 20  $\mu$ m. (D) Quantification of data from (C), normalized to control.  $***p < 0.001$  versus control. Data are representative of three independent experiments. HBMEC, human brain microvascular endothelial cell; DAPI, 4',6-diamidino-2-phenylindole; E6AP, E6-associated protein.
