# Supplementary material
Source: PubMed Central journal article supplement (PMC4048580)
Supplement: Supp_Fig5.pdf [file Supp_Fig5.pdf]

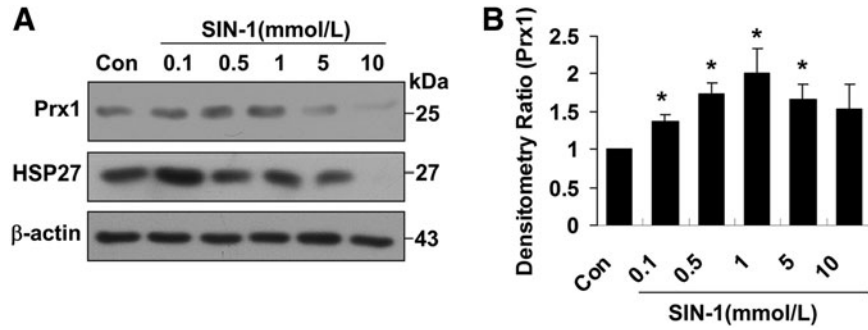

**SUPPLEMENTARY FIG. S5. Temporal changes in Prx1 and HSP27 protein levels after SIN-1 treatment *in vitro*.** (A) EA.hy926 cells were cultured without or with SIN-1 at various concentrations (0.1, 0.5, 1, 5, and 10 mM). The dose-dependent changes of Prx1 and HSP27 were detected with immunoblotting. (B) Quantifications of the temporal changes of Prx1 protein level after SIN-1 treatment. Immunoblots are representative of three independent experiments. \* $p < 0.05$  versus control. HSP27, heat shock protein 27; SIN-1, 3-morpholinosydnonimine.
