# Supplementary material
Source: PubMed Central journal article supplement (PMC4048580)
Supplement: Supp_Fig6.pdf [file Supp_Fig6.pdf]

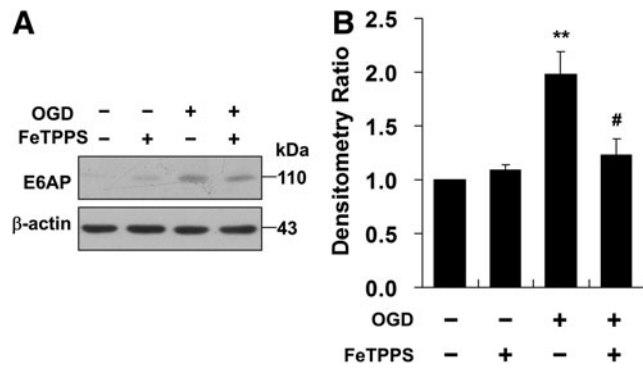

**SUPPLEMENTARY FIG. S6. The effect of ONOO<sup>-</sup> decomposition catalysts on OGD-induced E6AP expression in endothelial cells.** In cultured EA.hy926 cells, FeTPPS (1  $\mu$ M) was added before expose to 6 h OGD. **(A)** Immunoblots are representative of three independent experiments. Immunodetection of  $\beta$ -actin was used as a loading control. **(B)** Quantification of E6AP protein levels was performed using densitometric analysis of the immunoblots. Data are expressed as the percentage of values of control (mean  $\pm$  SEM). \*\* $p$  < 0.01 versus control; # $p$  < 0.05 versus OGD. ONOO<sup>-</sup>, peroxynitrite.
