# Supplementary material
Source: PubMed Central journal article supplement (PMC4048580)
Supplement: Supp_Fig7.pdf [file Supp_Fig7.pdf]

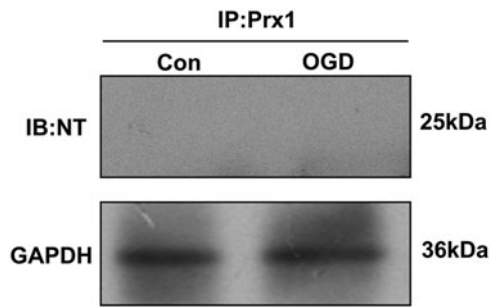

**SUPPLEMENTARY FIG. S7. Immunoprecipitation of Prx1 from cell lysates of OGD-treated endothelial cells followed by blotting with an anti-nitrotyrosine antibody.** Cell lysates from endothelial cells were prepared and resolved by SDS-PAGE. The OGD (6 h)-induced protein tyrosine nitration of Prx1 was detected by the immunoprecipitation. SDS-PAGE, sodium dodecyl sulfate-polyacrylamide gel electrophoresis.
