# Supplementary material
Source: PubMed Central journal article supplement (PMC4048580)
Supplement: Supp_Fig8.pdf [file Supp_Fig8.pdf]

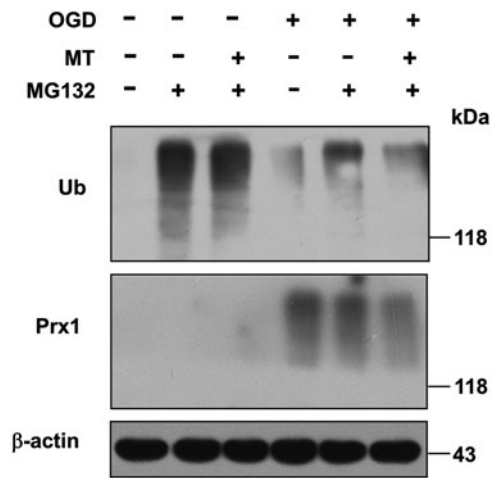

**SUPPLEMENTARY FIG. S8. The effect of ONOO<sup>-</sup> scavenger on OGD-induced Prx1 polyubiquitination in endothelial cells.** In cultured EA.hy926 cells, MT (10 mM) with or without MG132 (5 μM) was added before expose to OGD. The anti-ubiquitin and anti-Prx1 antibodies were used to detect the changes of Prx1 ubiquitination.
