# Supplementary material
Source: PubMed Central journal article supplement (PMC4048580)
Supplement: Supp_Fig9.pdf [file Supp_Fig9.pdf]

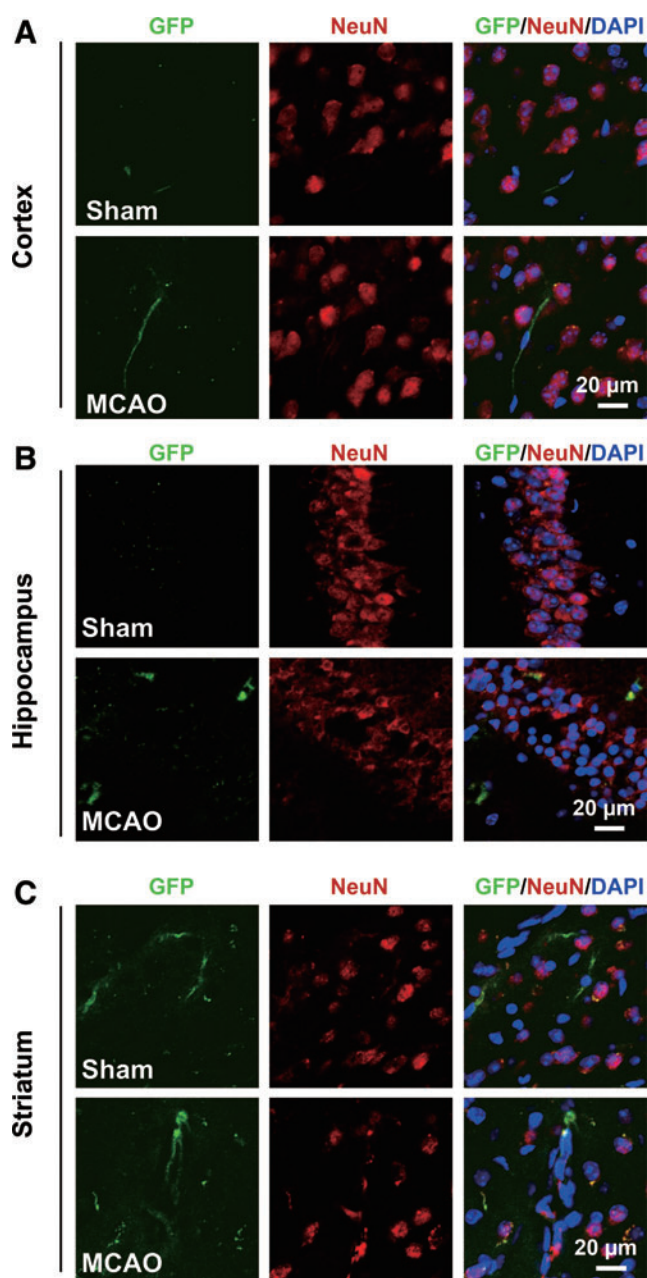

**SUPPLEMENTARY FIG. S9. The distribution of LV-GFP-Prx1 in the mouse brain 2 weeks after intracerebroventricular injection.** Representative immunostaining demonstrating that NeuN (red) not colocalized with GFP-Prx1 on the mice cortex (A), hippocampus (B), and striatum (C) 24 h after MCAO. MCAO, middle cerebral artery occlusion; NeuN, neuronal nuclear marker.
