# Supplementary material
Source: PubMed Central journal article supplement (PMC4048580)
Supplement: Supp_Fig10.pdf [file Supp_Fig10.pdf]

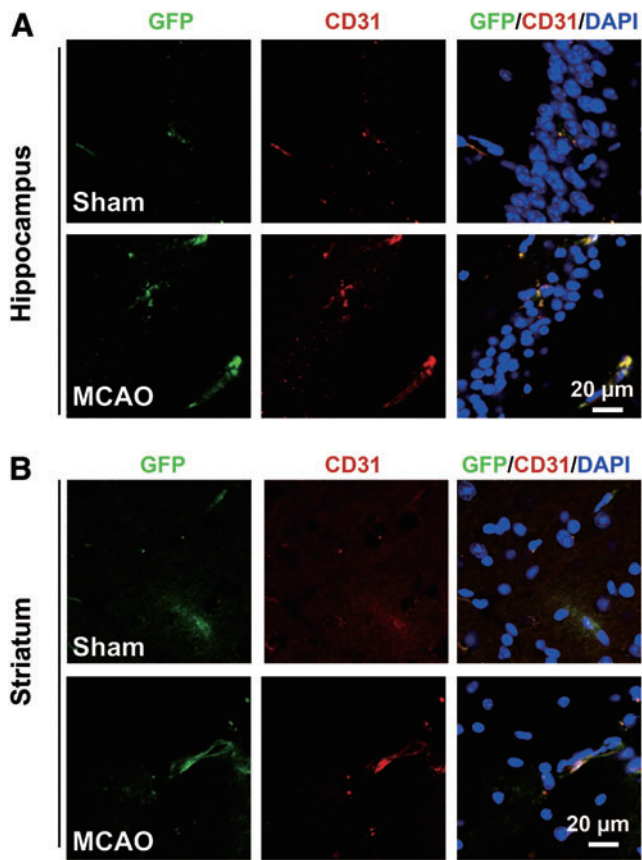

**SUPPLEMENTARY FIG. S10.** The distribution of LV-GFP-Prx1 in the mouse brain 2 weeks after intracerebroventricular injection. Representative immunostaining demonstrating that CD31 (red) colocalized with GFP-Prx1 on the mice hippocampus (A) and striatum (B) 24 h after MCAO.
