# Supplementary material
Source: PubMed Central journal article supplement (PMC4048580)
Supplement: Supp_Fig11.pdf [file Supp_Fig11.pdf]

### E6AP (Homo sapiens)

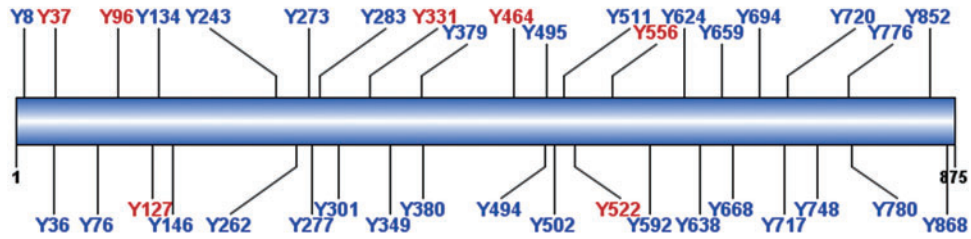

**SUPPLEMENTARY FIG. S11. Prediction of potential tyrosine nitration site of E6AP based on the sequence.** The computational predictor GSP-YNO2 (<http://yno2.biocuckoo.org>) ranked the potential tyrosine nitration site (red) of 38 tyrosine residues in E6AP with high score, according to the E6AP sequence information.
